# Supplementary material for: The NF-Y Transcription Factor Family in Watermelon: Re-Characterization, Assembly of ClNF-Y Complexes, Hormone- and Pathogen-Inducible Expression and Putative Functions in Disease Resistance
Source: MDPI journal article supplement (doi:10.3390/ijms232415778), 2022-12-12
Supplement: s1 [file s1]

**The NF-Y Transcription Factor Family in Watermelon:  
Re-Characterization, Assembly of CINP-Y Complexes,  
Hormone- and Pathogen-Inducible Expression and Putative  
Functions in Disease Resistance**

**Siyu Jiang, Hui Wang, Ya Wen, Jiayu Liang, Dayong Li \* and Fengming Song \***

Key Laboratory of Crop Diseases and Insect Pests of Ministry of Agriculture, Institute of Biotechnology, Zhejiang University, Hangzhou 310058, China

\* Correspondence: dyli@zju.edu.cn (D.L.); fmsong@zju.edu.cn (F.S.)

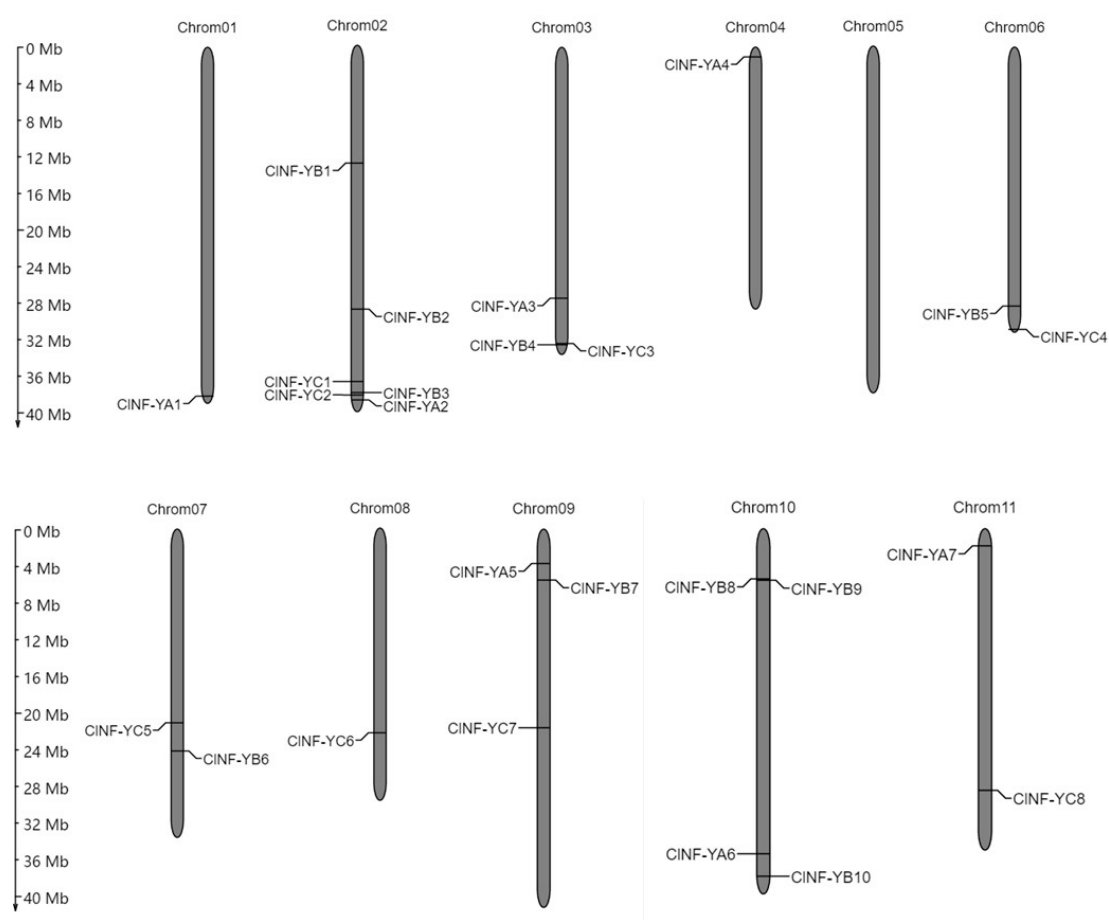

**Figure S1.** Distribution of *CINP-Y* genes on watermelon chromosomes.

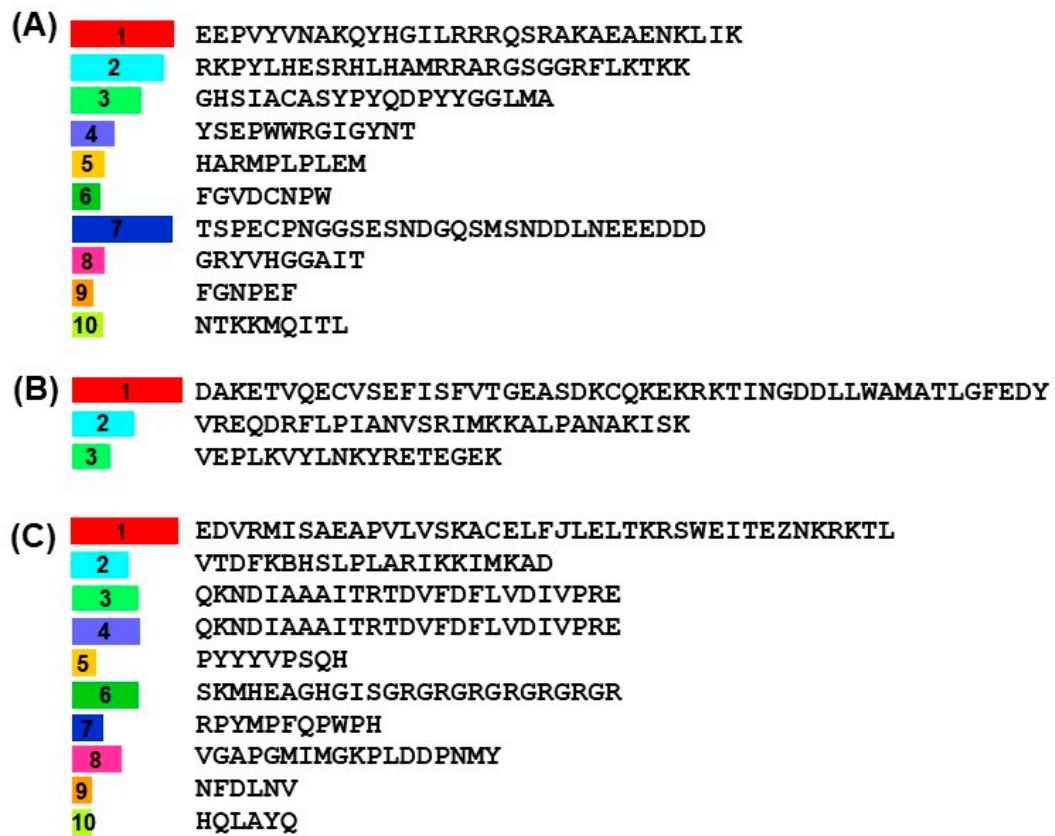

**Figure S2.** Conserved motifs in CINF-YAs (A), CINF-YBs (B), and CINF-YCs (C) identified by MEME.

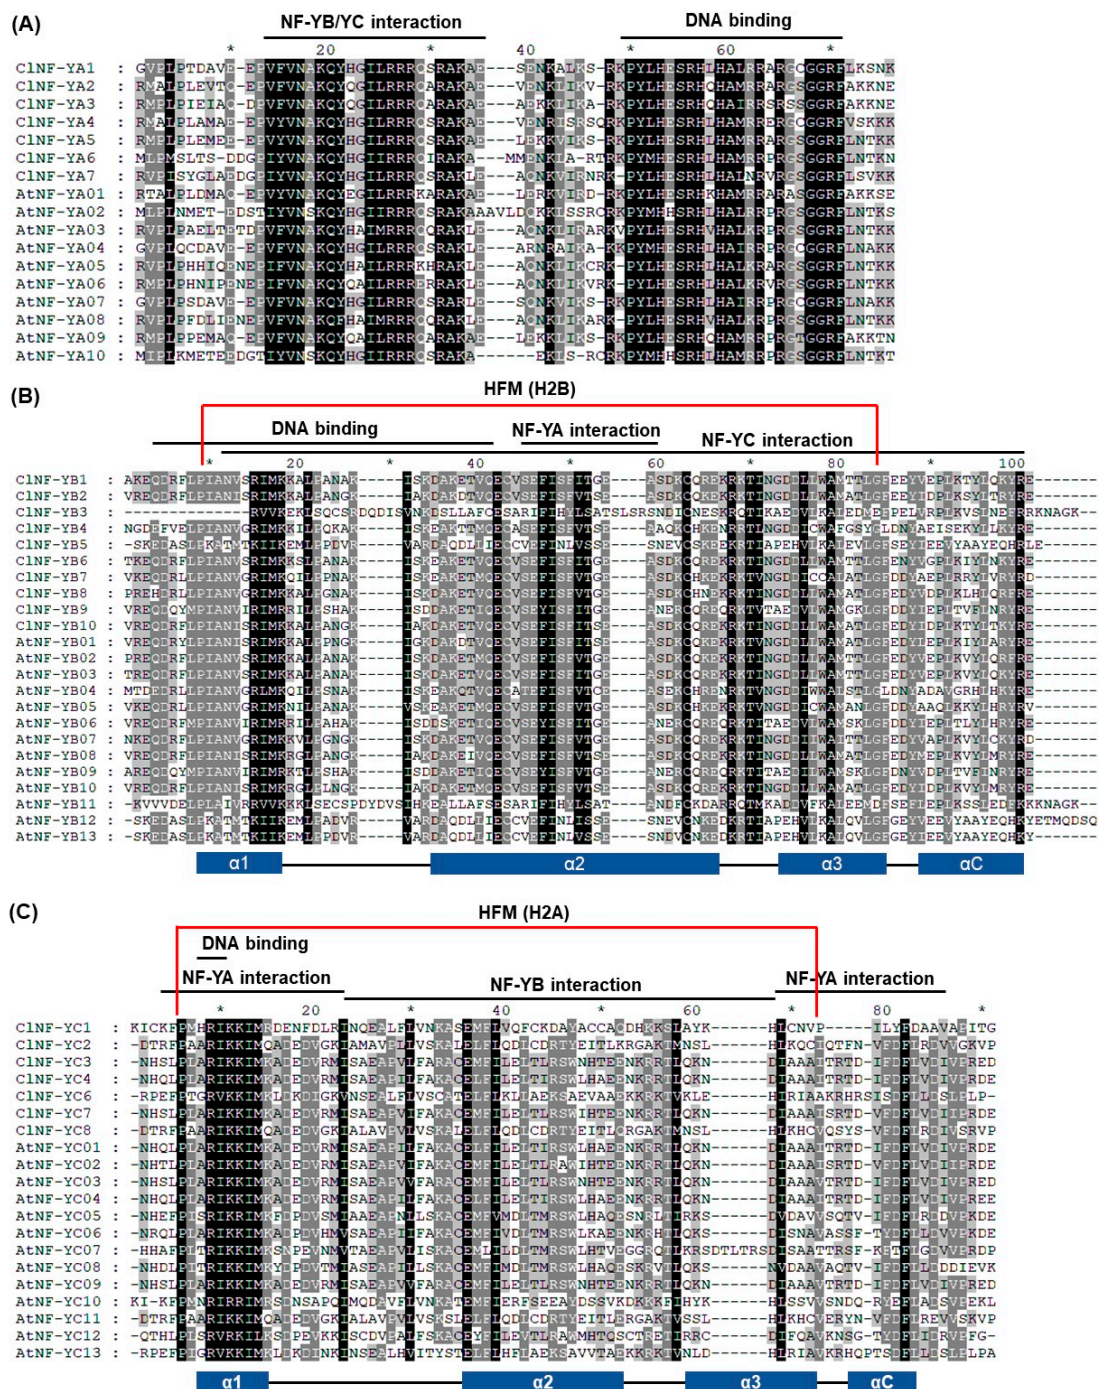

**Figure S3.** Sequence alignments of the conserved domains in watermelon CtNF-YAs, CtNF-YBs, and CtNF-YCs with Arabidopsis AtNF-Ys. (A) CtNF-YA subfamily; (B) CtNF-YB subfamily; (C) CtNF-YC subfamily. Multiple sequences alignment was constructed by DNAMAN software. The completely conserved amino acids are colored by black boxes and the relatively conserved amino acids (80%-100%) are colored by grey boxes. Regions responsible for subunit interaction and DNA binding are marked above the sequences and the structures of the conserved domains in CtNF-YBs and CtNF-YCs are indicated below the sequences.

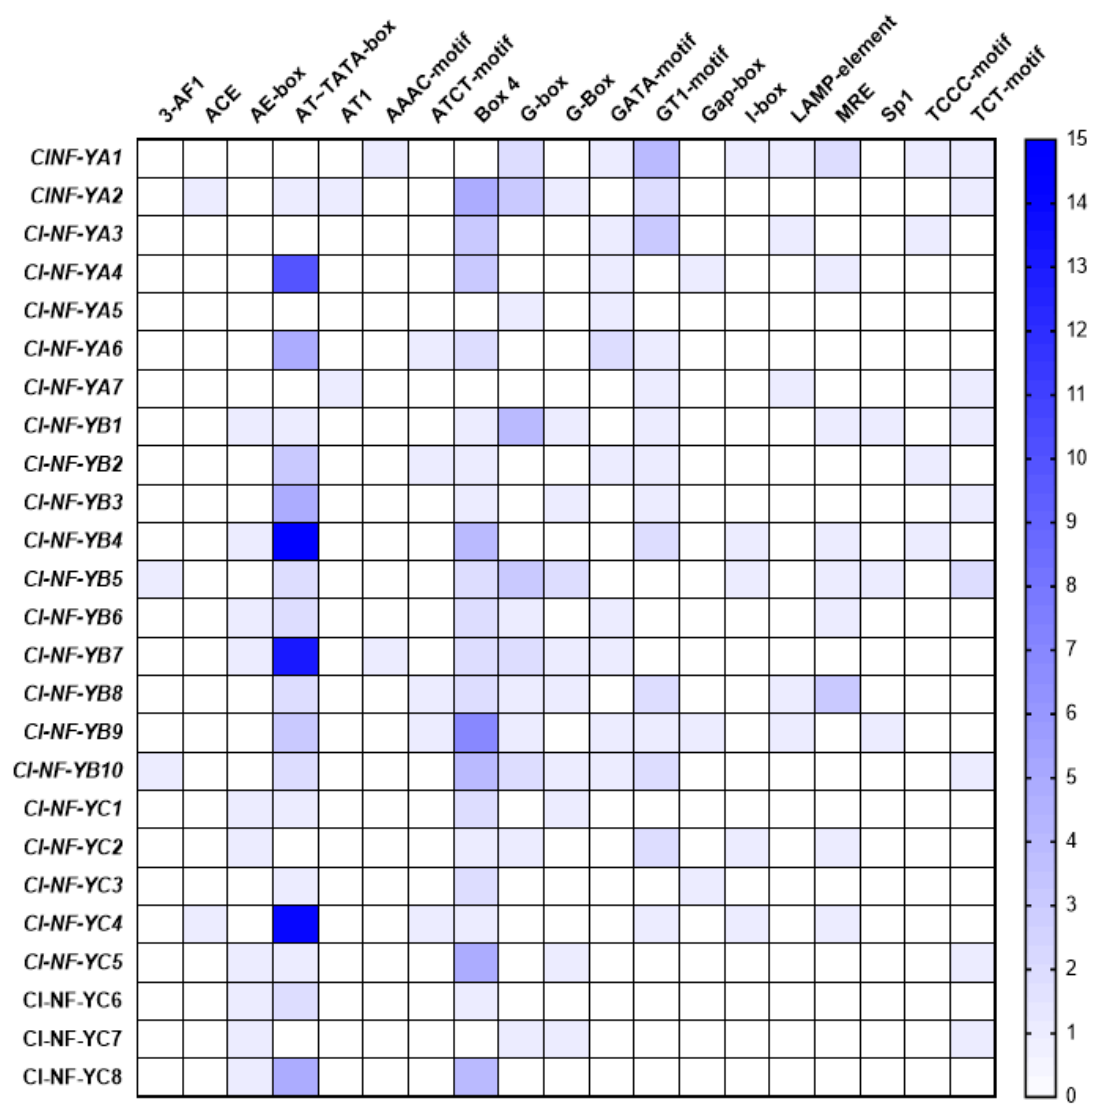

**Figure S4.** Light-responsive *cis*-elements present in promoters of the watermelon *CIN-F-Y* genes.

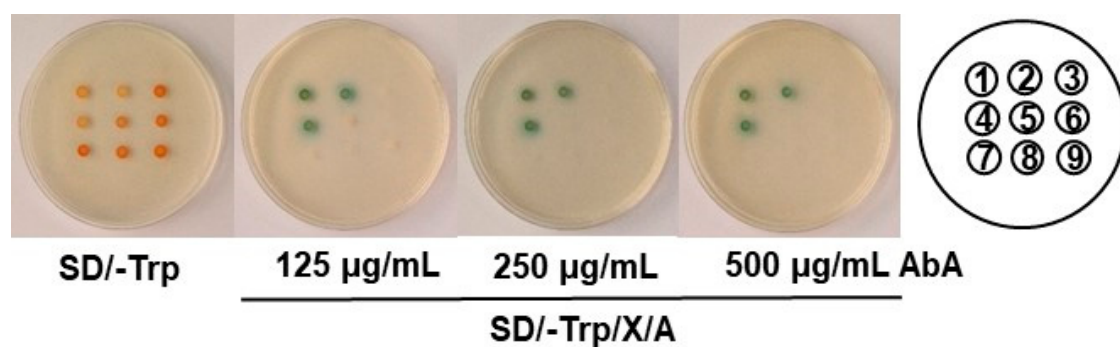

**Figure S5.** Autoactivation activity of CINP-YCs in Y2H assays. Yeast cells were transformed with pGBKT7-CINP-YCs and grown on SD/-Trp medium. Autoactivation activity was visualized by the appearance of blue color of the yeast cells after adding 40 µg/mL X- $\alpha$ -gal. Different concentrations of AbA were supplemented into SD/-Trp medium to inhibit putative autoactivation activity. Experiments were repeated three times with similar results.



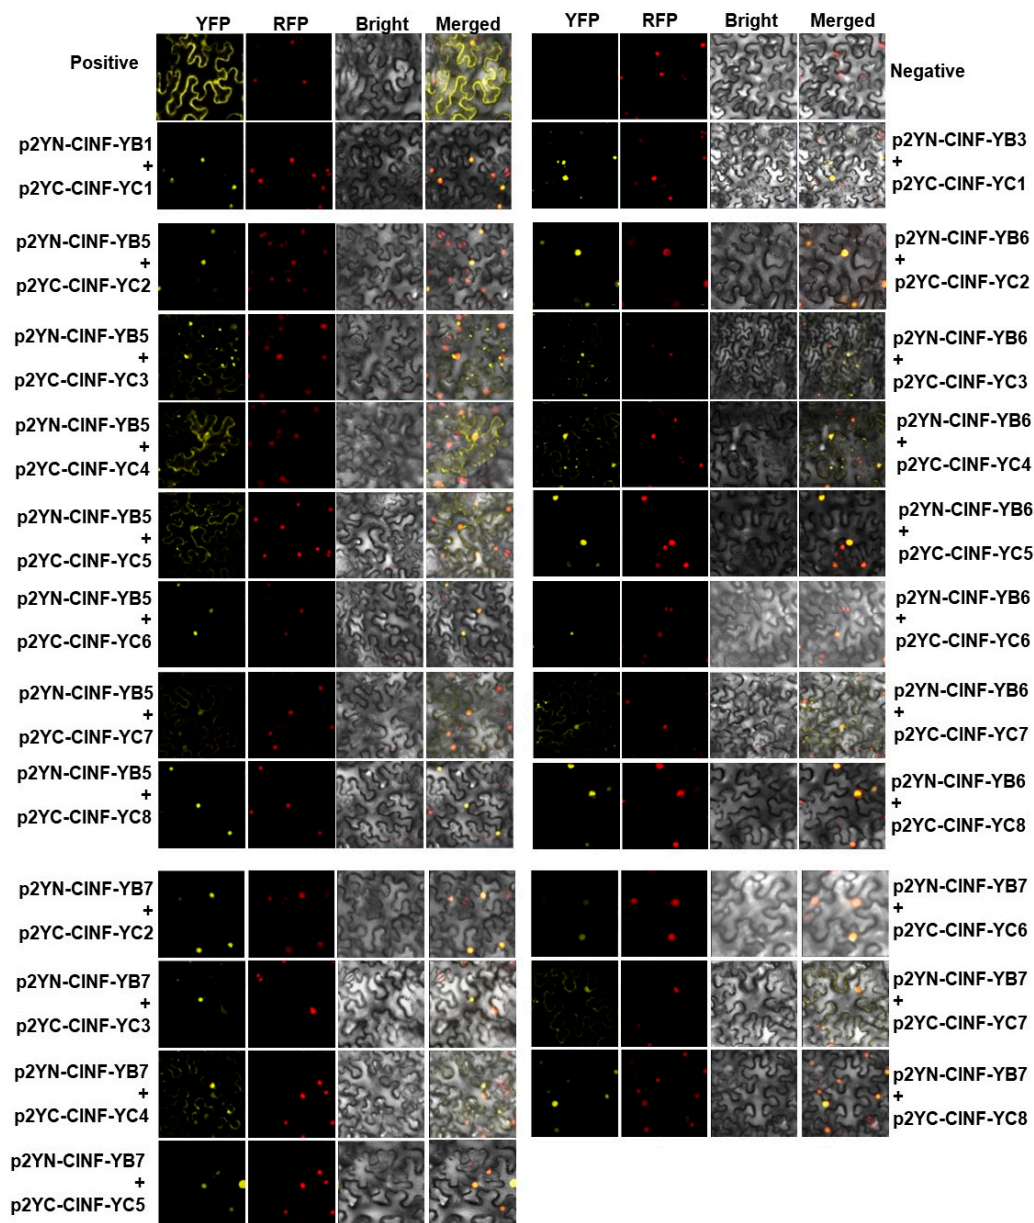

(Continued, see next page for legend)

(Continued)

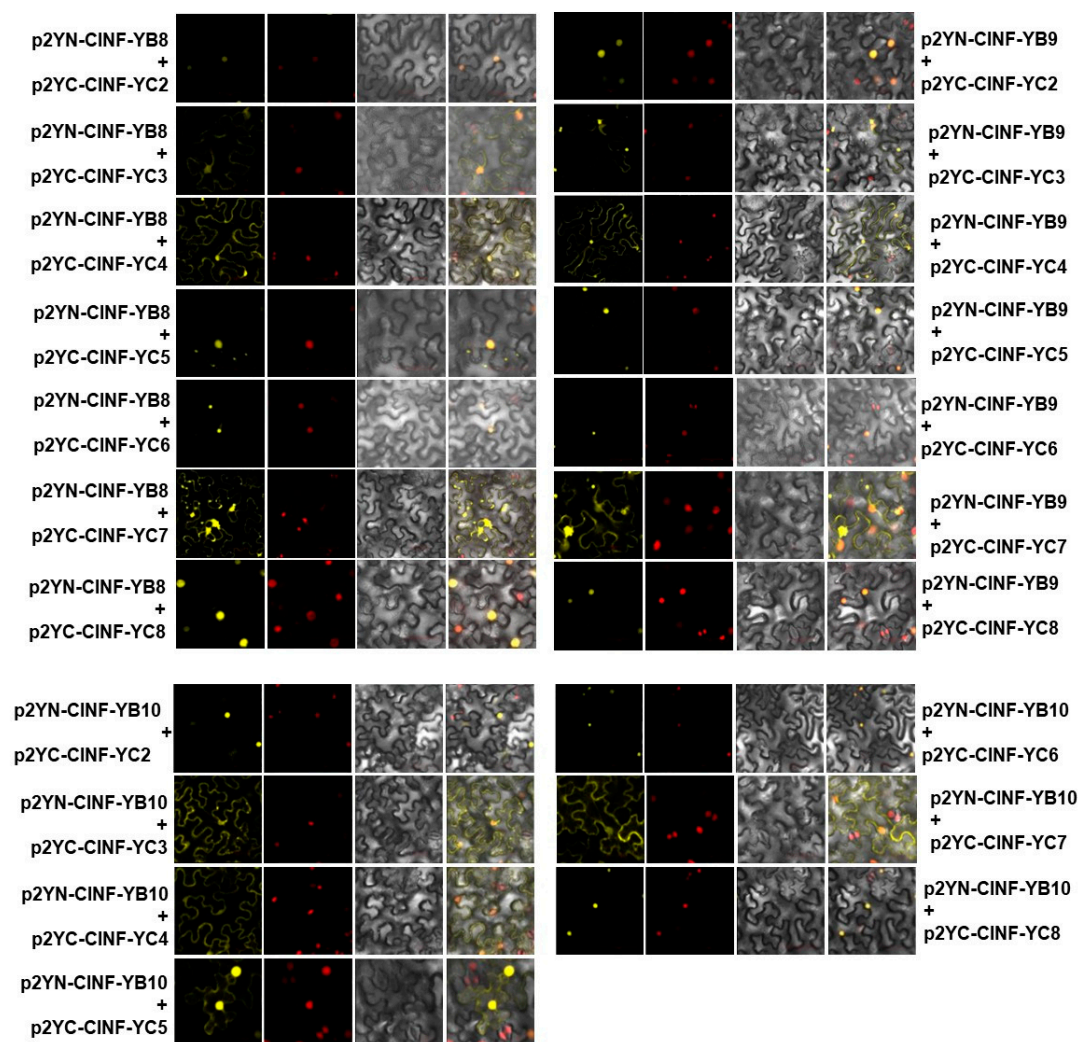

**Figure S6.** Interactions between CINP-YBs and CINP-YCs in BiFC assays. Experiments were performed three times with similar results.



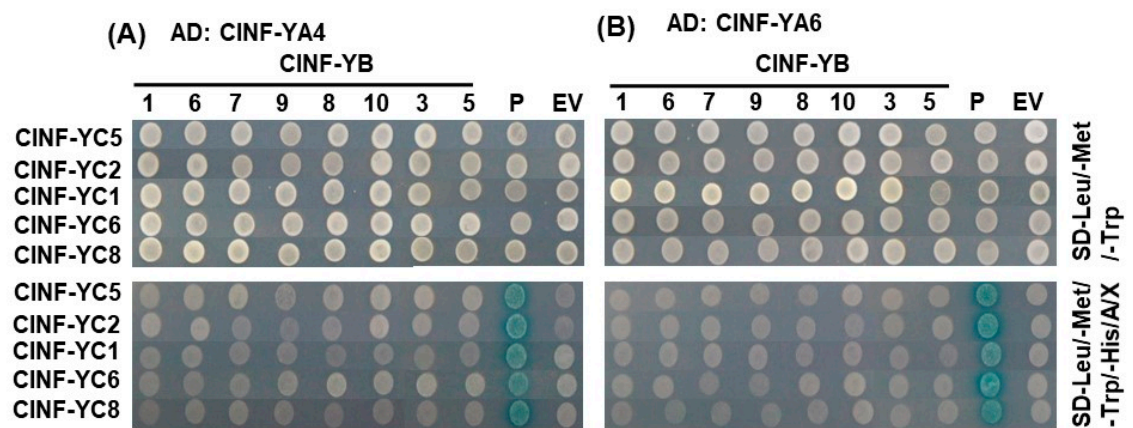

**Figure S7.** CINF-YA4 and -YA6 did not assemble into CINF-Y complexes with any of the CINF-YB/-YC heterodimers in Y3H assays. CINF-YA4 and CINF-YA6 were cloned into pGADT7 to fuse with the GAL4 activation domain, while paired combinations of CINF-YBs and CINF-YCs were cloned into pBridge to fuse with the GAL4 DNA binding domain. Growth of yeasts co-transformed with pGADT7 and pBridge vectors were grown on SD-Leu/-Met/-Trp noninteraction selective medium or on SD-Leu/-Met/-Trp/-His/A/X interaction selective medium. Experiments were performed three times with similar results.

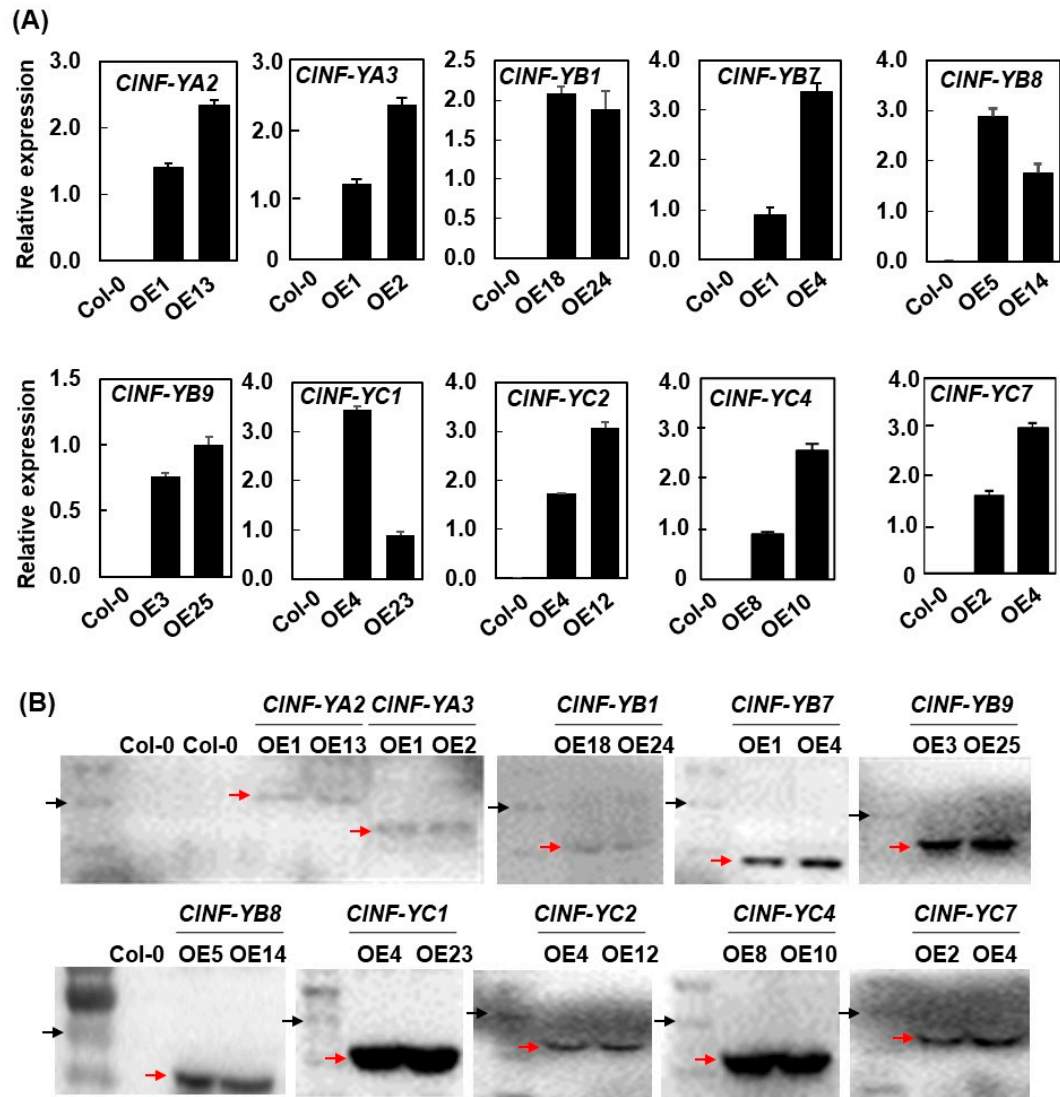

**Figure S8.** Characterization of the *CIN-F-Y*-overexpressing transgenic Arabidopsis lines. (A) Transcript levels of the *CIN-F-Y* genes in their corresponding transgenic Arabidopsis lines. Leaf samples were collected from four-week-old Arabidopsis plants, and qRT-PCR (B) analyses were performed with the Arabidopsis *AtActin* gene as an internal control. (B) Detection of the *CIN-F-Y*-GFP fusion proteins in transgenic Arabidopsis lines by Western blotting using anti-GFP antibody. Black arrows indicate the molecular weight of 63 kDa, while the red arrows indicate the target fusion proteins. Experiments were repeated three times with similar results and the data presented are the means  $\pm$  SE from three independent experiments.

**Table S1.** Ka/Ks ratio of the *CINF-Y* gene pairs.

| Gene pairs                | Ka     | Ks     | Ka/Ks  | Types of selection  |
|---------------------------|--------|--------|--------|---------------------|
| <i>CINF-YA2-CINF-YA3</i>  | 0.2122 | 0.9165 | 0.2315 | Purifying selection |
| <i>CINF-YA2-CINF-YA5</i>  | 0.4201 | 1.2898 | 0.3257 | Purifying selection |
| <i>CINF-YB2-CINF-YB10</i> | 0.1909 | 1.701  | 0.1122 | Purifying selection |

**Table S2.** Collinear gene pairs between watermelon (*Citrullus lanatus*) and *Arabidopsis thaliana*, rice (*Oryza sativa*), and cucumber (*Cucumis sativus*), and their Ka/Ks ratios.

| ID                       | Genes            | ID                          | Genes              | Ka     | Ks     | Ka/Ks  |
|--------------------------|------------------|-----------------------------|--------------------|--------|--------|--------|
| <i>Citrullus lanatus</i> |                  | <i>Arabidopsis thaliana</i> |                    |        |        |        |
| Cla97C01G025170          | <i>CINF-YA1</i>  | AT1G30500                   | <i>AtNF-YA7</i>    | Na     | Na     | Na     |
| Cla97C01G025170          | <i>CINF-YA1</i>  | AT2G34720                   | <i>AtNF-YA4</i>    | 0.3314 | 1.8808 | 0.1762 |
| Cla97C02G049270          | <i>CINF-YA2</i>  | AT3G20910                   | <i>AtNF-YA9</i>    | 0.3865 | 1.2602 | 0.3067 |
| Cla97C02G049270          | <i>CINF-YA2</i>  | AT5G12840                   | <i>AtNF-YA1</i>    | 0.3597 | 2.0487 | 0.1756 |
| Cla97C03G063440          | <i>CINF-YA3</i>  | AT3G20910                   | <i>AtNF-YA9</i>    | 0.3981 | 1.3213 | 0.3013 |
| Cla97C03G063440          | <i>CINF-YA3</i>  | AT5G12840                   | <i>AtNF-YA1</i>    | 0.3820 | 1.5179 | 0.2517 |
| Cla97C10G201180          | <i>CINF-YA6</i>  | AT5G06510                   | <i>AtNF-YA10</i>   | 0.3833 | 1.6131 | 0.2376 |
| Cla97C02G039490          | <i>CINF-YB2</i>  | AT2G37060                   | <i>AtNF-YB8</i>    | 0.2017 | 3.9198 | 0.0515 |
| Cla97C02G048360          | <i>CINF-YB3</i>  | AT2G27470                   | <i>AtNF-YB11</i>   | Na     | Na     | Na     |
| Cla97C03G067370          | <i>CINF-YB4</i>  | AT1G09030                   | <i>AtNF-YB4</i>    | 0.3787 | 1.9730 | 0.1919 |
| Cla97C06G124610          | <i>CINF-YB5</i>  | AT5G08190                   | <i>AtNF-YB12</i> , | Na     | Na     | Na     |
| Cla97C09G168740          | <i>CINF-YB7</i>  | AT2G47810                   | <i>AtNF-YB5</i>    | Na     | Na     | Na     |
| Cla97C10G203800          | <i>CINF-YB10</i> | AT2G37060                   | <i>AtNF-YB8</i>    | 0.0944 | 1.6693 | 0.0566 |
| Cla97C10G203800          | <i>CINF-YB10</i> | AT3G53340                   | <i>AtNF-YB10</i>   | 0.1578 | 1.8270 | 0.0864 |
| Cla97C02G047110          | <i>CINF-YC1</i>  | AT1G07980                   | <i>AtNF-YC10</i>   | Na     | Na     | Na     |
| Cla97C03G067230          | <i>CINF-YC3</i>  | AT1G08970                   | <i>AtNF-YC9</i>    | Na     | Na     | Na     |
| Cla97C03G067230          | <i>CINF-YC3</i>  | AT1G54830                   | <i>AtNF-YC3</i> ,  | Na     | Na     | Na     |
| Cla97C06G127670          | <i>CINF-YC4</i>  | AT3G48590                   | <i>AtNF-YC1</i>    | Na     | Na     | Na     |
| Cla97C06G127670          | <i>CINF-YC4</i>  | AT5G63470                   | <i>AtNF-YC4</i>    | 0.0950 | 2.3127 | 0.0411 |
| <i>Citrullus lanatus</i> |                  | <i>Oryza sativa</i>         |                    |        |        |        |
| Cla97C01G025170          | <i>CINF-YA1</i>  | LOC_Os12g41880              | <i>OsNF-YA9</i>    | 0.2284 | Na     | Na     |
| Cla97C10G201180          | <i>CINF-YA6</i>  | LOC_Os07g06470              | <i>OsNF-YA5</i>    | 0.2892 | Na     | Na     |
| Cla97C11G207940          | <i>CINF-YA7</i>  | LOC_Os02g53620              | <i>OsNF-YA11</i>   | 0.3244 | 2.3306 | 0.1392 |
| Cla97C02G039490          | <i>CINF-YB2</i>  | LOC_Os01g61810              | <i>OsNF-YB2</i>    | 0.2157 | Na     | Na     |
| Cla97C09G168740          | <i>CINF-YB7</i>  | LOC_Os01g70890              | <i>OsNF-YB6</i>    | 0.1924 | Na     | Na     |
| Cla97C10G203800          | <i>CINF-YB10</i> | LOC_Os01g61810              | <i>OsNF-YB2</i>    | 0.2101 | Na     | Na     |
| Cla97C10G203800          | <i>CINF-YB10</i> | LOC_Os05g38820              | <i>OsNF-YB3</i>    | 0.0636 | Na     | Na     |
| <i>Citrullus lanatus</i> |                  | <i>Cucumis sativus</i>      |                    |        |        |        |
| Cla97C01G025170          | <i>CINF-YA1</i>  | CsaV3_6G052320              |                    | 0.0222 | 0.2111 | 0.1051 |
| Cla97C02G049270          | <i>CINF-YA2</i>  | CsaV3_6G039350              |                    | 0.0260 | 0.1527 | 0.1700 |
| Cla97C02G049270          | <i>CINF-YA2</i>  | CsaV3_7G031020              |                    | 0.5621 | 1.0997 | 0.5111 |
| Cla97C03G063440          | <i>CINF-YA3</i>  | CsaV3_1G042800              |                    | 0.0250 | 0.2033 | 0.1230 |
| Cla97C04G068610          | <i>CINF-YA4</i>  | CsaV3_4G011610              |                    | 0.1213 | 0.2783 | 0.4359 |
| Cla97C09G166390          | <i>CINF-YA5</i>  | CsaV3_7G031020              |                    | 0.0391 | 0.1883 | 0.2077 |
| Cla97C10G201180          | <i>CINF-YA6</i>  | CsaV3_3G038100              |                    | 0.0340 | 0.2110 | 0.1609 |
| Cla97C02G035590          | <i>CINF-YB1</i>  | CsaV3_6G009670              |                    | 0.0342 | 0.2858 | 0.1198 |
| Cla97C02G039490          | <i>CINF-YB2</i>  | CsaV3_3G035490              |                    | 0.1891 | 2.2902 | 0.0826 |

|                 |                  |                 |        |        |        |
|-----------------|------------------|-----------------|--------|--------|--------|
| Cla97C02G039490 | <i>CINF-YB2</i>  | CsaV3_5G006310  | 0.0563 | 0.3626 | 0.1553 |
| Cla97C02G048360 | <i>CINF-YB3</i>  | CsaV3_6G038390  | 0.0502 | 0.2052 | 0.2446 |
| Cla97C03G067370 | <i>CINF-YB4</i>  | CsaV3_1G038920  | 0.1801 | 0.3509 | 0.5133 |
| Cla97C06G124610 | <i>CINF-YB5</i>  | CsaV3_1G003510  | 0.0082 | 0.1965 | 0.0415 |
| Cla97C07G136140 | <i>CINF-YB6</i>  | CsaV3_4G004940  | 0.0368 | 0.4065 | 0.0906 |
| Cla97C07G136140 | <i>CINF-YB6</i>  | CsaV3_UNG179380 | 0.0368 | 0.4065 | 0.0906 |
| Cla97C09G168740 | <i>CINF-YB7</i>  | CsaV3_7G028980  | 0.0693 | 0.3517 | 0.1971 |
| Cla97C10G188720 | <i>CINF-YB8</i>  | CsaV3_3G004080  | 0.0228 | 0.3014 | 0.0758 |
| Cla97C10G188900 | <i>CINF-YB9</i>  | CsaV3_3G004250  | 0.0422 | 0.4781 | 0.0882 |
| Cla97C10G203800 | <i>CINF-YB10</i> | CsaV3_3G035490  | 0.0124 | 0.0737 | 0.1690 |
| Cla97C10G203800 | <i>CINF-YB10</i> | CsaV3_5G006310  | 0.2230 | 1.4689 | 0.1518 |
| Cla97C02G047110 | <i>CINF-YC1</i>  | CsaV3_6G021790  | 0.0788 | 0.1997 | 0.3949 |
| Cla97C02G048620 | <i>CINF-YC2</i>  | CsaV3_6G038670  | 0.0496 | 0.2539 | 0.1953 |
| Cla97C03G067230 | <i>CINF-YC3</i>  | CsaV3_1G039060  | 0.0067 | 0.1954 | 0.0341 |
| Cla97C06G127670 | <i>CINF-YC4</i>  | CsaV3_1G000520  | 0.0039 | 0.2948 | 0.0133 |
| Cla97C07G135160 | <i>CINF-YC5</i>  | CsaV3_4G006020  | 0.0260 | 0.5215 | 0.0499 |
| Cla97C09G176240 | <i>CINF-YC7</i>  | CsaV3_7G006030  | 0.0097 | 0.2484 | 0.0390 |
| Cla97C11G218950 | <i>CINF-YC8</i>  | CsaV3_5G029530  | 0.0264 | 0.2257 | 0.1168 |

---



**Table S3.** *Cis*-elements in promoters of the watermelon *CINF-Y* genes

| Elements           | Functions                                | <i>CINF-YAs</i> |    |    |    |    |    |    | <i>CINF-YBs</i> |    |    |    |    |    |    |    |    |    | <i>CINF-YCs</i> |    |    |    |    |    |    |    |
|--------------------|------------------------------------------|-----------------|----|----|----|----|----|----|-----------------|----|----|----|----|----|----|----|----|----|-----------------|----|----|----|----|----|----|----|
|                    |                                          | 1               | 2  | 3  | 4  | 5  | 6  | 7  | 1               | 2  | 3  | 4  | 5  | 6  | 7  | 8  | 9  | 10 | 1               | 2  | 3  | 4  | 5  | 6  | 7  | 8  |
| 3-AF1              | light responsive                         |                 |    |    |    |    |    |    |                 |    |    |    | 1  |    |    |    |    | 1  |                 |    |    |    |    |    |    |    |
| <b>A-box</b>       | <b>cis-acting regulatory element</b>     |                 |    | 1  |    |    |    |    |                 |    |    |    |    |    |    |    |    |    |                 |    |    | 1  |    | 1  | 1  |    |
| <b>AAGAA-motif</b> | <b>development-related motifs</b>        | 4               | 3  | 1  | 1  | 1  | 2  |    | 2               | 2  | 1  | 1  |    | 2  |    | 2  |    |    |                 | 2  | 2  | 3  |    | 1  | 1  |    |
| ABRE3a             | stress and hormonal response             |                 | 1  |    |    |    |    |    | 1               |    |    |    |    |    |    |    |    |    |                 |    |    |    |    |    | 1  |    |
| <b>ABRE</b>        | <b>abscisic acid responsiveness</b>      |                 | 5  |    |    |    |    |    | 4               |    | 1  |    | 3  |    | 2  | 2  | 1  | 4  |                 |    |    |    | 1  | 1  | 2  |    |
| <b>ABRE4</b>       | <b>stress and hormonal response</b>      |                 | 1  |    |    |    |    |    | 1               |    |    |    |    |    |    |    |    |    |                 |    |    |    |    |    | 1  |    |
| <b>AC-II</b>       | <b>vascular-specific expression</b>      |                 |    | 1  |    |    |    |    |                 |    |    |    |    |    |    |    |    |    |                 |    |    |    |    |    |    |    |
| <b>AACA</b>        | <b>seed storage protein genes</b>        |                 |    |    |    | 1  |    |    |                 | 1  |    | 1  |    |    |    |    |    |    |                 |    |    |    |    |    |    |    |
| ACE                | light responsiveness                     |                 | 1  |    |    |    |    |    |                 |    |    |    |    |    |    |    |    |    |                 |    |    | 1  |    |    |    |    |
| AE-box             | part of a module for light response      |                 |    |    |    |    |    |    | 1               |    |    | 1  |    | 1  | 1  |    |    |    | 1               | 1  |    |    | 1  | 1  | 1  | 1  |
| AP-1               | regulation of ribonucleotide reductase   |                 | 1  |    |    |    |    |    |                 |    |    |    |    |    |    |    |    |    |                 |    |    |    |    |    | 1  |    |
| <b>ARE</b>         | <b>essential for anaerobic induction</b> | 4               | 1  | 2  |    | 1  | 3  | 2  |                 | 5  |    | 2  | 1  | 1  | 5  | 1  |    | 1  | 3               | 6  | 1  |    | 2  |    | 2  |    |
| TATA               | general <i>cis</i> -element              |                 | 1  |    |    | 2  |    | 1  |                 | 2  | 1  | 1  | 1  | 1  | 2  |    | 3  |    |                 |    |    |    |    | 1  | 2  |    |
| AT~TATA-box        | light responsive                         |                 | 1  |    | 10 |    | 5  |    | 1               | 3  | 5  | 15 | 2  | 2  | 13 | 2  | 3  | 2  | 1               |    | 1  | 14 | 1  | 2  |    | 5  |
| AT1 motif          | light-responsive                         |                 | 1  |    |    |    |    | 1  |                 |    |    |    |    |    |    |    |    |    |                 |    |    |    |    |    |    |    |
| AT-rich element    | AT-rich DNA binding protein              |                 |    |    |    |    |    |    | 1               | 1  |    | 1  |    |    | 1  |    |    |    |                 |    |    | 1  |    |    |    |    |
| <b>AT-rich</b>     | <b>elicitor-mediated activation</b>      |                 |    |    |    |    |    |    |                 |    |    |    |    |    | 1  |    |    |    |                 |    |    |    |    |    |    |    |
| AAAC-motif         | light responsive element                 | 1               |    |    |    |    |    |    |                 |    |    |    |    |    | 1  |    |    |    |                 |    |    |    |    |    |    |    |
| ATCT-motif         | light responsive                         |                 |    |    |    |    | 1  |    |                 | 1  |    |    |    |    |    | 1  | 1  |    |                 |    |    | 1  |    |    |    |    |
| <b>AuxRR-core</b>  | <b>auxin responsive</b>                  |                 |    |    |    |    |    | 1  |                 | 1  |    |    |    |    |    | 1  |    |    |                 |    |    |    |    |    |    | 1  |
| Box 4              | light responsive                         |                 | 5  | 3  | 3  |    | 2  |    | 1               | 1  | 1  | 4  | 2  | 2  | 2  | 2  | 7  | 4  | 2               | 1  | 2  | 1  | 5  | 1  |    | 4  |
| CAAT-box           | common <i>cis</i> -acting element        | 22              | 41 | 27 | 27 | 14 | 35 | 33 | 30              | 23 | 28 | 37 | 43 | 21 | 24 | 38 | 32 | 24 | 25              | 17 | 24 | 26 | 30 | 48 | 26 | 33 |

|              |                                         |   |   |   |   |   |   |   |   |   |   |   |   |   |   |   |   |   |   |   |   |   |   |
|--------------|-----------------------------------------|---|---|---|---|---|---|---|---|---|---|---|---|---|---|---|---|---|---|---|---|---|---|
| CAT-box      | related to meristem expression          |   |   |   |   | 1 | 1 |   |   |   |   | 2 |   |   |   | 1 |   |   |   |   |   | 1 |   |
| CARE         | involved in viral DNA replication       |   |   |   |   |   |   | 1 |   |   |   |   |   |   | 1 |   |   |   |   |   |   |   |   |
| CCAAT-box    | MYBHv1 binding site                     |   |   | 1 |   | 1 |   |   |   | 1 |   |   |   | 1 |   |   |   |   | 1 |   |   |   |   |
| CCGTCC-motif | related to meristem specific activation |   |   | 1 |   |   |   |   |   |   |   |   |   |   |   |   |   |   |   |   | 1 |   | 1 |
| CCGTCC-box   | meristem specific activation            |   |   | 1 |   |   |   |   |   |   |   |   |   |   |   |   |   |   |   |   | 1 |   | 1 |
| CGTCA-motif  | MeJA-responsive                         |   |   | 1 |   | 1 | 1 |   | 1 |   | 3 |   |   |   |   | 3 | 1 |   |   | 2 | 1 |   | 1 |
| CTAG-motif   | rearrange the free energy               |   |   |   |   | 1 |   |   | 1 | 1 |   |   |   |   |   |   |   |   |   | 1 |   |   |   |
| DRE core     | dehydration-responsive                  | 1 |   |   |   |   |   |   |   |   |   |   |   |   |   | 2 |   | 1 |   |   |   |   |   |
| F-box        | involved in abiotic stress              |   |   |   |   |   |   |   |   |   |   |   |   |   |   |   |   |   |   |   |   | 3 |   |
| ERE          | ethylene-responsive                     |   |   | 1 | 3 | 1 |   |   | 1 |   | 1 | 1 | 3 | 2 | 1 | 3 | 1 |   |   |   | 2 | 4 |   |
| G-Box        | light responsive                        |   | 1 |   |   |   |   | 1 |   | 1 |   | 2 |   | 1 | 1 |   | 1 | 1 |   |   |   | 1 | 1 |
| G-box        | light responsive                        | 2 | 3 |   |   | 1 |   | 4 |   |   |   | 3 | 1 | 2 | 1 | 1 | 2 |   | 1 |   |   |   | 1 |
| GC-motif     | waterlogging stress pathways            |   |   |   |   |   |   |   |   |   |   |   |   |   |   |   |   |   |   |   |   | 1 |   |
| GA-motif     | light responsive                        |   |   |   |   |   |   |   | 1 |   |   |   |   | 1 |   |   |   |   |   |   |   | 1 |   |
| GARE-motif   | gibberellin-responsive                  |   |   |   |   | 1 | 1 | 1 |   |   |   |   |   |   |   |   |   |   |   |   |   |   | 1 |
| GATA-motif   | part of a light responsive element      | 1 |   | 1 | 1 | 1 | 2 |   |   | 1 |   |   |   | 1 | 1 |   | 1 | 1 |   |   |   |   |   |
| GCN4_motif   | involved in endosperm expression        |   |   |   |   | 1 |   |   |   |   |   | 2 |   | 1 | 1 |   | 1 |   |   |   |   |   |   |
| GT1-motif    | light responsive                        | 4 | 2 | 3 |   | 1 | 1 | 1 | 1 | 1 | 2 |   |   |   | 2 | 1 | 2 |   | 2 |   | 1 |   |   |
| Gap-box      | necessary for light responsiveness      |   |   |   | 1 |   |   |   |   |   |   |   |   |   |   | 1 |   |   |   | 1 |   |   |   |
| I-box        | part of a light responsive element      | 1 |   |   |   |   |   |   |   |   | 1 | 1 |   |   |   |   |   |   | 1 |   | 1 |   |   |
| LAMP-element | light responsive                        | 1 |   | 1 |   |   |   | 1 |   |   |   |   |   |   | 1 | 1 |   |   |   |   |   |   |   |
| LTR          | low-temperature responsive              | 1 |   |   |   | 3 | 1 |   |   | 1 |   |   |   |   |   |   |   |   |   | 2 |   |   |   |
| MBS          | involved in drought-inducibility        | 2 |   |   |   | 1 | 1 | 2 |   | 2 |   | 1 | 1 |   | 1 |   |   | 1 |   | 1 |   |   | 1 |
| MBSI         | flavonoid biosynthetic genes            |   |   |   |   |   |   |   |   |   |   |   |   |   |   |   |   |   |   |   |   | 1 |   |
| MRE          | light responsive                        | 2 |   |   | 1 |   |   | 1 |   |   | 1 | 1 | 1 |   | 3 |   |   |   | 1 |   | 1 |   |   |

|                  |                                    |    |    |    |    |    |    |    |   |    |    |    |    |    |    |    |    |    |    |    |    |    |    |    |    |    |
|------------------|------------------------------------|----|----|----|----|----|----|----|---|----|----|----|----|----|----|----|----|----|----|----|----|----|----|----|----|----|
| Myc              | water and drought responsive       | 2  |    |    | 1  | 1  |    |    |   |    | 1  |    | 1  |    |    |    | 1  |    |    |    |    |    |    | 1  |    |    |
| MYC              | abiotic stress responses           | 2  | 1  | 1  | 3  |    | 5  | 3  | 2 | 4  | 1  | 4  | 3  |    |    | 3  | 4  | 1  | 1  |    | 5  | 5  | 3  | 9  | 3  | 6  |
| Myb-binding site | activation of lysozyme enhancer    | 1  |    | 2  |    | 1  | 2  | 1  | 1 | 1  |    |    |    |    |    | 1  |    |    | 1  |    | 1  |    |    | 1  | 1  | 1  |
| Myb              | stress-associated                  | 2  | 1  | 1  |    | 2  | 1  | 2  |   |    | 2  |    | 1  | 1  |    | 2  |    |    | 2  |    | 2  |    |    |    | 1  |    |
| MYB              | development and stress response    | 5  | 1  | 4  |    | 2  | 3  | 2  | 2 | 2  | 1  | 1  | 4  | 1  | 1  | 6  | 1  | 2  | 2  | 2  | 5  | 2  | 1  | 3  | 1  | 3  |
| MYB recognition  | DNA-binding specificities          |    |    | 1  |    | 1  |    |    |   |    | 1  |    |    |    | 1  |    |    |    |    |    | 1  |    |    |    |    |    |
| MYB-like         | sequence-specific DNA binding      | 3  | 1  | 2  |    |    | 1  | 1  |   | 1  | 1  |    | 1  |    |    | 4  | 1  | 2  | 1  | 1  |    | 1  |    | 1  |    |    |
| MSA-like         | cell cycle regulation              |    |    |    |    |    |    |    |   |    |    |    |    |    |    |    |    |    |    |    |    |    |    |    |    |    |
| O2-site          | zein metabolism regulation         |    |    | 2  |    |    |    | 1  |   |    | 1  |    |    |    |    |    |    |    |    |    | 1  | 1  |    | 1  |    |    |
| P-box            | gibberellin-responsive element     | 2  |    | 1  |    |    | 1  |    |   |    |    | 1  |    |    |    | 1  |    |    | 1  |    |    |    | 1  | 1  |    |    |
| RY-element       | seed-specific regulation           |    |    |    | 1  |    |    |    |   |    |    |    |    |    |    | 1  |    |    |    |    |    |    |    |    |    |    |
| Sp1              | light responsive element           |    |    |    |    |    |    |    | 1 |    |    |    | 1  |    |    |    | 1  |    |    |    |    |    |    |    |    |    |
| TATA-box         | core promoter element              | 15 | 38 | 12 | 52 | 39 | 20 | 22 | 9 | 26 | 36 | 61 | 50 | 33 | 54 | 20 | 39 | 16 | 24 | 27 | 25 | 56 | 35 | 29 | 10 | 68 |
| TATC-box         | gibberellin-responsive             | 1  | 1  |    | 1  |    |    |    |   |    |    |    | 1  |    |    |    |    |    |    |    |    |    |    |    |    |    |
| TC-rich repeats  | defense and stress responsive      |    | 1  |    |    | 1  |    | 1  |   |    | 1  |    |    | 1  |    |    |    |    |    |    |    |    |    | 1  |    |    |
| TCA              | salicylic acid responsive          |    |    |    | 1  |    | 1  |    |   | 2  | 1  |    |    |    |    |    | 1  |    |    |    | 2  |    |    | 1  |    |    |
| TCA-element      | salicylic acid responsive          |    |    |    |    | 1  | 2  |    |   |    | 3  | 1  | 1  |    | 1  | 2  |    | 2  | 1  | 1  |    | 3  |    |    | 1  | 2  |
| TCCC-motif       | light responsive                   | 1  |    | 1  |    |    |    |    |   | 1  |    | 1  |    |    |    |    |    |    |    |    |    |    |    |    |    |    |
| TCT-motif        | part of a light responsive element | 1  | 1  |    |    |    |    | 1  | 1 |    | 1  |    | 2  |    |    |    |    | 1  |    |    |    |    | 1  |    | 1  |    |
| TGA-element      | auxin-responsive                   | 1  |    |    |    |    |    | 1  | 1 |    |    |    |    |    |    |    |    | 2  |    |    |    |    | 2  | 1  | 1  |    |
| TGACG-motif      | MeJA-responsive                    |    |    |    |    | 1  | 1  |    | 1 |    | 3  |    |    |    |    |    | 3  | 1  |    |    | 2  | 1  |    | 1  | 1  | 1  |
| Unnamed 1        | CGTGG                              | 1  | 3  |    |    |    |    |    | 3 |    | 1  |    | 5  | 1  | 1  | 3  | 2  |    | 1  | 1  |    |    |    |    | 1  |    |
| Unnamed_1        | GAATTTAATTAA                       |    |    |    |    |    |    |    |   |    |    |    |    |    |    |    |    |    |    |    |    |    | 1  |    |    |    |
| Unamed__1        | GGATTTTACAGT                       |    |    |    |    |    |    |    |   |    |    |    |    |    |    |    |    |    | 1  |    |    |    |    |    |    |    |
| Unnamed__2       | AACCTAACCT                         | 1  |    |    |    | 1  |    |    |   |    |    | 1  |    | 1  |    | 1  |    |    | 1  |    |    |    |    |    |    |    |

|                        |                                   |          |          |          |          |          |          |          |          |          |          |          |          |          |          |          |          |          |          |          |          |          |          |          |          |          |
|------------------------|-----------------------------------|----------|----------|----------|----------|----------|----------|----------|----------|----------|----------|----------|----------|----------|----------|----------|----------|----------|----------|----------|----------|----------|----------|----------|----------|----------|
| Unnamed__4             | CTCC                              | 11       | 3        | 8        | 5        | 16       | 10       | 3        | 11       | 8        | 8        | 10       | 5        | 7        | 5        | 10       | 2        | 9        | 8        | 1        | 5        | 8        | 12       | 6        | 1        | 2        |
| Unnamed__6             | taTAAATATCT                       |          | 1        |          |          |          | 1        |          | 1        |          |          |          | 1        |          |          |          | 1        |          |          |          |          |          |          |          |          | 2        |
| Unnamed__8             |                                   |          |          |          |          |          |          |          |          |          |          |          |          |          |          |          |          |          |          |          |          |          |          |          | 1        |          |
| Unnamed__10            |                                   |          |          |          |          |          |          |          |          |          |          |          |          |          |          |          |          |          |          |          |          |          |          |          | 1        |          |
| Unnamed__12            |                                   |          |          |          |          |          |          |          |          |          |          |          |          |          |          |          |          |          |          |          |          |          |          |          | 1        |          |
| Unnamed__14            |                                   |          |          |          |          |          |          |          |          |          |          |          |          |          |          |          |          |          |          |          |          |          |          |          | 1        |          |
| <b>W box</b>           | <b>hormone-mediated signaling</b> | <b>1</b> |          |          |          |          |          | <b>1</b> | <b>2</b> | <b>1</b> |          |          | <b>2</b> |          |          | <b>2</b> | <b>2</b> |          | <b>2</b> |          |          | <b>1</b> | <b>1</b> | <b>1</b> |          |          |
| <b>WUN-motif</b>       | <b>wound-responsive</b>           |          | <b>3</b> |          |          | <b>1</b> |          |          | <b>1</b> |          |          |          | <b>1</b> | <b>2</b> |          |          |          |          |          | <b>1</b> |          |          |          | <b>1</b> | <b>1</b> |          |
| <b>box S</b>           | <b>pathogen-inducible</b>         | <b>1</b> |          |          | <b>1</b> |          |          |          |          |          |          |          |          |          |          | <b>1</b> | <b>1</b> |          |          |          |          |          |          |          |          |          |
| chs-CMA1a              | light responsive                  |          | 1        |          |          |          |          |          |          |          |          |          |          | 1        |          |          |          |          |          |          |          | 1        |          |          | 1        | 1        |
| chs-CMA2a              | light responsive                  |          |          |          |          |          |          |          |          |          |          |          | 1        | 1        |          |          |          |          | 1        |          | 1        |          |          |          |          |          |
| <b>circadian</b>       | <b>circadian control</b>          |          |          |          |          |          |          |          |          |          |          |          |          |          | <b>1</b> |          |          |          |          |          |          |          |          |          |          |          |
| <b>STRE</b>            | <b>stress response</b>            | <b>2</b> | <b>2</b> | <b>2</b> |          | <b>2</b> | <b>4</b> | <b>1</b> | <b>2</b> |          |          | <b>2</b> | <b>2</b> | <b>2</b> | <b>1</b> | <b>1</b> | <b>1</b> | <b>4</b> | <b>3</b> | <b>1</b> | <b>1</b> | <b>3</b> | <b>1</b> |          | <b>5</b> | <b>1</b> |
| <b>WRE3</b>            | <b>stress responsive</b>          | <b>1</b> |          |          |          |          |          | <b>1</b> |          |          |          |          |          | <b>1</b> |          | <b>2</b> | <b>1</b> |          |          |          |          |          |          |          |          |          |
| <b>as-1</b>            | <b>development-related motifs</b> |          |          |          |          | <b>1</b> | <b>1</b> |          | <b>1</b> |          | <b>3</b> |          |          |          |          |          | <b>3</b> | <b>1</b> |          |          | <b>2</b> | <b>1</b> |          | <b>1</b> | <b>1</b> | <b>1</b> |
| <b>Plant Ap-2-like</b> | <b>floret development</b>         |          |          |          |          |          |          | <b>1</b> |          |          |          |          |          |          |          |          |          |          |          |          |          |          |          |          |          |          |
| re2f-1                 |                                   |          |          |          |          |          |          |          |          |          | 1        |          |          |          |          |          |          |          |          |          |          |          |          | 1        |          |          |
| <b>Subtotal</b>        | Excluding CAAT- and TATA-boxes    | 63       | 47       | 43       | 33       | 45       | 56       | 31       | 52       | 42       | 49       | 52       | 55       | 35       | 48       | 62       | 52       | 49       | 35       | 24       | 39       | 57       | 41       | 43       | 46       | 36       |
| <b>TOTAL</b>           |                                   | 100      | 126      | 82       | 112      | 98       | 111      | 86       | 91       | 91       | 113      | 150      | 148      | 89       | 126      | 120      | 123      | 89       | 84       | 68       | 88       | 139      | 106      | 120      | 82       | 137      |

Note: Growth- and development-related *cis*-elements are labeled with red color; hormone-responsive *cis*-elements are indicated with blue color; abiotic and biotic stress-responsive *cis*-elements are shown in purple color.

Summary: Total *cis*-elements for *CINF-Y* gene promoters: 2679; total *cis*-elements for *CINF-Y* gene promoters excluding CAAT- and TATA-boxes: 1135; average of *cis*-elements for *CINF-Y* gene promoters excluding CAAT- and TATA-boxes: 45.4

**Table S4.** Primers used in this study.

| Primer names   | Sequence (5'-3')           | Size (bp) |
|----------------|----------------------------|-----------|
| <i>Cloning</i> |                            |           |
| CINF-YA1-F     | ATGGCCTCCTTATATAATGGTGA    | 603       |
| CINF-YA1-R     | TCAGTTCTCTGACGAAGCAAG      |           |
| CINF-YA2-F     | ATGCAGTCGAAGTCTAAAAGTG     | 1026      |
| CINF-YA2-R     | TCACTTGATGGCAAGACGCC       |           |
| CINF-YA3-F     | ATGCAGTCAAAGTCTGAAACC      | 810       |
| CINF-YA3-R     | CTATTCTGAGGCCTTGTTTGT      |           |
| CINF-YA4-F     | ATGATGAGCCCTGAAATAGAT      | 615       |
| CINF-YA4-R     | TCATATATATGCAGATAAATGTAG   |           |
| CINF-YA5-F     | ATGCAATCAAAACCAGAAAATG     | 1026      |
| CINF-YA5-R     | TCAATTGATGGGGATGGCCCT      |           |
| CINF-YA6-F     | ATGGCACCACAAACCTGGCTATTTG  | 1167      |
| CINF-YA6-R     | TTACTTCATACTTGATATCTGA     |           |
| CINF-YA7-F     | ATGACAATGACTTTGTCTGATAA    | 903       |
| CINF-YA7-R     | CTATGTTCCGTTTCCGCCAT       |           |
| CINF-YB1-F     | ATGGCGGATTCTGATAACGAATC    | 618       |
| CINF-YB1-R     | CTACCGGTGTCCGGTGCC         |           |
| CINF-YB2-F     | ATGGCGGAGCCTCCCACCAGT      | 498       |
| CINF-YB2-R     | TTAGAGAAGAGAGATTATTACTTG   |           |
| CINF-YB3-F     | ATGGGAGATCAGCATAATGG       | 405       |
| CINF-YB3-R     | TTAAAATTGATTATTGTGTCTTG    |           |
| CINF-YB4-F     | ATGAGCGGCCACAAACGAAAC      | 678       |
| CINF-YB4-R     | TCACCAACCAGAGCTCTGTT       |           |
| CINF-YB5-F     | ATGGATGAAAACACAGGCATG      | 480       |
| CINF-YB5-R     | TCATGCATCATGATTATTATTATTAG |           |
| CINF-YB6-F     | ATGTTGCTGACCCCAAACAAGC     | 627       |
| CINF-YB6-R     | TCAAAGCTGGCTACCATTCC       |           |
| CINF-YB7-F     | ATGGCTGACTCCGACAACGATTC    | 528       |
| CINF-YB7-R     | CTACCTGGGCCGACCCGTA        |           |
| CINF-YB8-F     | ATGGCTGATGCTCCGGCGAGT      | 528       |
| CINF-YB8-R     | TTAATGCATATTATTATTCGAGAG   |           |
| CINF-YB9-F     | ATGGAGAAAAAAGTAGGTGCC      | 486       |
| CINF-YB9-R     | TCAGTTATCACTGGCGCCAAT      |           |
| CINF-YB10-F    | ATGACCAAAATTATCAAAGAG      | 411       |
| CINF-YB10-R    | TTAGCTCTCTAAACTTTGCTCAG    |           |
| CINF-YC1-F     | ATGGATCAGCAAGGGCATGGC      | 783       |
| CINF-YC1-R     | CTATTGATCAGGAGGGGTTTG      |           |
| CINF-YC2-F     | ATGGACACCAACAATCAAGCCC     | 663       |
| CINF-YC2-R     | CTACCTCTGACCATCAAGAT       |           |
| CINF-YC3-F     | ATGAGGCAAGCGGGAGCAT        | 354       |
| CINF-YC3-R     | TCAGCAAGGAATGGACATAGT      |           |



|            |                          |     |
|------------|--------------------------|-----|
| CINF-YC4-F | ATGGATCAATCAGAGCGTTCTC   | 801 |
| CINF-YC4-R | CTATGCATCACTTTGCTGCTGA   |     |
| CINF-YC5-F | ATGCAAGCTGATGAAGATGTAG   | 792 |
| CINF-YC5-R | CTAACCTTCTTCGTCGTAATCT   |     |
| CINF-YC6-F | ATGGCTTCATCCAAAAAGTC     | 603 |
| CINF-YC6-R | CTATAACAACCAATGAAAATAGA  |     |
| CINF-YC7-F | ATGGAGGAAGAGGAAACC       | 423 |
| CINF-YC7-R | CTATGACTCGTTGGTCTCCG     |     |
| CINF-YC8-F | ATGCAAGCAGATGAGGATGTTG   | 801 |
| CINF-YC8-R | TTACTCCTCTTCATCATAATCTTC |     |

---

***OE vectors***

|                |                                                  |      |
|----------------|--------------------------------------------------|------|
| CINF-YA1-GFP-F | CCCGAGCTCATGGCCTCCTTATATAATGGTGA                 | 603  |
| CINF-YA1-GFP-R | CCCGGTACCGTTCTCTGACGAAGCAAGATCG                  |      |
| CINF-YA2-GFP-F | CCCGAGCTCATGCAGTCGAAGTCTAAAAGTG                  | 1026 |
| CINF-YA2-GFP-R | CCCGGTACCCTTGATGGCAAGACGCCTCTG                   |      |
| CINF-YA3-GFP-F | CCCGAGCTCATGCAGTCAAAGTCTGAAACC                   | 810  |
| CINF-YA3-GFP-R | CCCGGTACCTTCTGAGGCCTTGTTTGTCAG                   |      |
| CINF-YA4-GFP-F | CCCGAGCTCATGATGAGCCCTGAAATAGAT                   | 615  |
| CINF-YA4-GFP-R | CCCGGTACCTATATATGCAGATAAATGTAGTTG                |      |
| CINF-YA5-GFP-F | CCCGAGCTCATGCAATCAAAACCAGAAAATG                  | 1026 |
| CINF-YA5-GFP-R | CCCGGTACCATTGATGGGGATGGCCCTCTG                   |      |
| CINF-YA6-GFP-F | CCCGAGCTCATGGCACCACAACTGGCTATTTG                 | 1167 |
| CINF-YA6-GFP-R | CCCGGTACCCTTCATACTTGATATCTGATTGG                 |      |
| CINF-YA7-GFP-F | CCCGAGCTCATGACAATGACTTTGTCTGATAA                 | 903  |
| CINF-YA7-GFP-R | CCCGGTACCTGTTCCGTTTCCGCCATGTAC                   |      |
| CINF-YB1-GFP-F | CCCGAGCTCATGGCGGATTCTGATAACGAATC                 | 618  |
| CINF-YB1-GFP-R | CCCGGTACCCCGGTGTCCGGTGCCGGAACC                   |      |
| CINF-YB2-GFP-F | CCCGAGCTCATGGCGGAGCCTCCCACCAAGT                  | 498  |
| CINF-YB2-GFP-R | CCCGGTACCGAGAAGAGAGATTATTACTTG                   |      |
| CINF-YB3-GFP-F | CCCGAGCTCATGGGAGATCAGCATAATGG                    | 405  |
| CINF-YB3-GFP-R | CCCGGTACCAAATTGATTATTGTGTTCTTG                   |      |
| CINF-YB4-GFP-F | AGCTTTCGCGAGCTCGGTACCATGAGCGGCCACAAAC<br>GAAAC   | 678  |
| CINF-YB4-GFP-R | GCCCTTGCTCACCATGGTACCCCAACCAGAGCTCTGTT<br>GAAG   |      |
| CINF-YB5-GFP-F | AGCTTTCGCGAGCTCGGTACCATGGATGAAAACACAG<br>GCATG   | 480  |
| CINF-YB5-GFP-R | GCCCTTGCTCACCATGGTACCTGCATCATGATTATTATT<br>ATTAG |      |
| CINF-YB6-GFP-F | CCCGAGCTCATGTTGCTGACCCCAAACAAGC                  | 627  |
| CINF-YB6-GFP-R | CCCGGTACCAAGCTGGCTACCATCCCCGC                    |      |
| CINF-YB7-GFP-F | CCCGAGCTCATGGCTGACTCCGACAACGATTC                 | 528  |
| CINF-YB7-GFP-R | CCCGGTACCCCTGGGCCGACCCGTAGTAG                    |      |
| CINF-YB8-GFP-F | CCCGAGCTCATGGCTGATGCTCCGGCGAGT                   | 528  |

|                 |                                        |     |
|-----------------|----------------------------------------|-----|
| CINF-YB8-GFP-R  | CCCGGTACCATGCATATTATTATTCGAGAG         |     |
| CINF-YB9-GFP-F  | CCCGAGCTCATGGAGAAAAAAGTAGGTGCC         | 486 |
| CINF-YB9-GFP-R  | CCCGGTACCGTTATCACTGGCGCCAATTTC         |     |
| CINF-YB10-GFP-F | CCCGAGCTCATGACCAAAATTATCAAAGAG         | 411 |
| CINF-YB10-GFP-R | CCCGGTACCGCTCTCTAAACTTTGCTCAG          |     |
| CINF-YC1-GFP-F  | AGCTTTCGCGAGCTCGGTACCATGGATCAGCAAGGGC  | 783 |
|                 | ATGGC                                  |     |
| CINF-YC1-GFP-R  | GCCCTTGCTCACCATGGTACC                  |     |
|                 | TTGATCAGGAGGGGTTTGATC                  |     |
| CINF-YC2-GFP-F  | AGCTTTCGCGAGCTCGGTACCATGGACACCAACAATCA | 663 |
|                 | AGCCC                                  |     |
| CINF-YC2-GFP-R  | GCCCTTGCTCACCATGGTACC                  |     |
|                 | CCTCTGACCATCAAGATTACC                  |     |
| CINF-YC3-GFP-F  | CCCGAGCTCATGAGGCAAGCGGGAGCAT           | 354 |
| CINF-YC3-GFP-R  | CCCGGTACCGCAAGGAATGGACATAG             |     |
| CINF-YC4-GFP-F  | CCCGAGCTCATGGATCAATCAGAGCGTTCTC        | 801 |
| CINF-YC4-GFP-R  | CCCGGTACCTGCATCACTTTGCTGCTGAGTTTG      |     |
| CINF-YC5-GFP-F  | CCCGAGCTCATGCAAGCTGATGAAGATGTAG        | 792 |
| CINF-YC5-GFP-R  | CCCGGTACCACCTTCTTCGTCGTAATCTTCC        |     |
| CINF-YC6-GFP-F  | CCCGAGCTCATGGCTTCATCCAAAAAGTC          | 603 |
| CINF-YC6-GFP-R  | CCCGGTACCTAACAACCAATGAAAATAGAC         |     |
| CINF-YC7-GFP-F  | AGCTTTCGCGAGCTCGGTACCATGGAGGAAGAGGAAA  | 423 |
|                 | CC                                     |     |
| CINF-YC7-GFP-R  | GCCCTTGCTCACCATGGTACCTGACTCGTTGGTCTCCG |     |
|                 | C                                      |     |
| CINF-YC8-GFP-F  | CCCGAGCTCATGCAAGCAGATGAGGATGTTG        | 801 |
| CINF-YC8-GFP-R  | CCCGGTACCCTCCTCTTCATCATAATCTTC         |     |

---

***BiFC assays***

|                  |                                        |     |
|------------------|----------------------------------------|-----|
| CINF-YB1-P2YN-1F | CCCTTAATTAACATGGCGGATTCTGATAACGAATC    | 618 |
| CINF-YB1-P2YN-1R | GGGACTAGTCCGGTGTCCGGTGCCG              |     |
| CINF-YB2-P2YN-1F | CCCTTAATTAACATGGCGGAGCCTCCCA           | 498 |
| CINF-YB2-P2YN-1R | GGGACTAGTGAGAAGAGAGATTATTACTTGAGTGTTTA |     |
| CINF-YB3-P2YN-1F | CCCTTAATTAACATGGGAGATCAGCATAATGGG      | 405 |
| CINF-YB3-P2YN-1R | GGGACTAGTAAATTGATTATTGTGTTCTTGTTTCATC  |     |
| CINF-YB4-P2YN-1F | CCCTTAATTAACATGAGCGGCCACAAACGAAACT     | 678 |
| CINF-YB4-P2YN-1R | GGGACTAGTCCAACCAGAGCTCTGTTGAAGATG      |     |
| CINF-YB5-P2YN-1F | CCCTTAATTAACATGGATGAAAACACAGGCA        | 480 |
| CINF-YB5-P2YN-1R | GGGACTAGTTGCATCATGATTATTATTATTAGTATTA  |     |
| CINF-YB6-P2YN-1F | CCCTTAATTAACATGTTGCTGACCCCAAACAAGC     | 627 |
| CINF-YB6-P2YN-1R | GGGACTAGTAAGCTGGCTACCATTCCTCCG         |     |
| CINF-YB7-P2YN-1F | CCCTTAATTAACATGGCTGACTCCGACAACGATC     | 528 |
| CINF-YB7-P2YN-1R | GGGACTAGTCCTGGGCGGACCCGTAAGTAGTA       |     |
| CINF-YB8-P2YN-F  | CCCTTAATTAACATGGCTGATGCTCCGGC          | 528 |
| CINF-YB8-P2YN-R  | GGGACTAGTATGCATATTATTATTCGAGAGTGTCTGT  |     |

|                  |                                        |     |
|------------------|----------------------------------------|-----|
| CINF-YB9-P2YN-F  | CCCTTAATTAACATGGAGAAAAAAGTAGGTGCCGG    | 486 |
| CINF-YB9-P2YN-R  | GGGACTAGTGTTATCACTGGCGCCAATTTTCAT      |     |
| CINF-YB10-P2YN-F | CCCTTAATTAACATGACCAAAATTATCAAAGAGATGTT | 411 |
|                  | ACC                                    |     |
| CINF-YB10-P2YN-R | GGGACTAGTGCTCTCTAAACTTTGCTCAGGCTCC     |     |
| CINF-YC1-P2YC-F  | CCCTTAATTAACATGGATCAGCAAGGGCATGG       | 783 |
| CINF-YC1-P2YC-R  | GGGACTAGTTTGATCAGGAGGGGTTTGATCTTG      |     |
| CINF-YC2-P2YC-F  | CCCTTAATTAACATGGACACCAACAATCAAGCC      | 663 |
| CINF-YC2-P2YC-R  | GGGACTAGTCCTCTGACCATCAAGATTACCC        |     |
| CINF-YC3-P2YC-F  | CCCTTAATTAACATGAGGCAAGCGGGAGCA         | 354 |
| CINF-YC3-P2YC-R  | GGGACTAGTGCAAGGAATGGACATAGTTTCAGTT     |     |
| CINF-YC4-P2YC-F  | CCCTTAATTAACATGGATCAATCAGAGCGTTCTCAG   | 801 |
| CINF-YC4-P2YC-R  | GGGACTAGTTGCATCACTTTGCTGCTGAGTTT       |     |
| CINF-YC5-P2YC-F  | CCCTTAATTAACATGCAAGCTGATGAAGATGTAGGG   | 792 |
| CINF-YC5-P2YC-R  | GGGACTAGTACCTTCTTCGTCGTAATCTTCCTCG     |     |
| CINF-YC6-P2YC-F  | CCCTTAATTAACATGGCTTCATCCAAAAAGTCAA     | 603 |
| CINF-YC6-P2YC-R  | GGGACTAGTTAACAACCAATGAAAATAGACAGCAG    |     |
| CINF-YC7-P2YC-F  | CCCTTAATTAACATGGAGGAAGAGGAAACCGG       | 423 |
| CINF-YC7-P2YC-R  | GGGACTAGTTGACTCGTTGGTCTCCGCC           |     |
| CINF-YC8-P2YC-F  | CCCTTAATTAACATGCAAGCAGATGAGGATGTTG     | 801 |
| CINF-YC8-P2YC-R  | GGGACTAGTCTCCTCTTCATCATAATCTTCCTCTTC   |     |

---

***Y3H assays***

|               |                                        |      |
|---------------|----------------------------------------|------|
| CINF-YA1-AD-F | GCCATGGAGGCCAGTGAATTCATGGCCTCCTTATATAA | 603  |
|               | TGGTGA                                 |      |
| CINF-YA1-AD-R | ATGCCACCCGGGTGGAATTCTCAGTTCTCTGACGAAG  |      |
|               | CAAGA                                  |      |
| CINF-YA2-AD-F | GCCATGGAGGCCAGTGAATTCATGCAGTCGAAGTCTA  | 1026 |
|               | AAAGTG                                 |      |
| CINF-YA2-AD-R | ATGCCACCCGGGTGGAATTCTCACTTGATGGCAAGAC  |      |
|               | GCC                                    |      |
| CINF-YA3-AD-F | GCCATGGAGGCCAGTGAATTCATGCAGTCAAAGTCTG  | 810  |
|               | AAACC                                  |      |
| CINF-YA3-AD-R | ATGCCACCCGGGTGGAATTCCTATTCTGAGGCCTTGT  |      |
|               | TTGT                                   |      |
| CINF-YA4-AD-F | GCCATGGAGGCCAGTGAATTCATGATGAGCCCTGAAA  | 615  |
|               | TAGATT                                 |      |
| CINF-YA4-AD-R | ATGCCACCCGGGTGGAATTCTCATATATATGCAGATA  |      |
|               | AATGTAG                                |      |
| CINF-YA5-AD-F | CCCGAATTCATGCAATCAAAACCAGAAAATGT       | 1026 |
| CINF-YA5-AD-R | CCCGAATTCTCAATTGATGGGGATGGCCCT         |      |
| CINF-YA6-AD-F | CCCGAATTCATGGCACCACAACTGGCTA           | 1167 |
| CINF-YA6-AD-R | CCCGAATTCTTACTTCATACTTGATATCTGA        |      |
| CINF-YA7-AD-F | GCCATGGAGGCCAGTGAATTCATGACAATGACTTTGTC | 903  |
|               | TGATA                                  |      |

|                    |                                                   |     |
|--------------------|---------------------------------------------------|-----|
| CINF-YA7-AD-R      | ATGCCCACCCGGGTGGAATTCCTATGTTCCGTTTCCGC<br>CAT     |     |
| CINF-YC1-BD-F      | CCCGAATTCATGGATCAGCAAGGGCATGG                     | 783 |
| CINF-YC1-BD-R      | CCCGAATTCCTATTGATCAGGAGGGGTTTG                    |     |
| CINF-YC2-BD-F      | ATGGCCATGGAGGCCGAATTCATGGACACCAACAATC<br>AAGCC    | 663 |
| CINF-YC2-BD-R      | TCGACGGATCCCCGGGAATTCCTACCTCTGACCATCAA<br>GAT     |     |
| CINF-YC3-BD-F      | CCCGAATTCATGAGGCAAGCGGGAGCAT                      | 354 |
| CINF-YC3-BD-R      | CCCGAATTCTCAGCAAGGAATGGACATAGT                    |     |
| CINF-YC4-BD-F      | CCCGAATTCATGGATCAATCAGAGCGTTCTC                   | 801 |
| CINF-YC4-BD-R      | CCCGAATTCCTATGCATCACTTTGCTGCTGA                   |     |
| CINF-YC5-BD-F      | CCCGAATTCATGCAAGCTGATGAAGATGTAG                   | 792 |
| CINF-YC5-BD-R      | CCCGAATTCCTAACCTTCTTCGTCGTAATCT                   |     |
| CINF-YC6-BD-F      | CCCGAATTCATGGCTTCATCCAAAAAGTCAA                   | 603 |
| CINF-YC6-BD-R      | CCCGAATTCCTATAACAACCAATGAAAATAGA                  |     |
| CINF-YC7-BD-F      | ATGGCCATGGAGGCCGAATTCATGGAGGAAGAGGAAA<br>CCGG     | 423 |
| CINF-YC7-BD-R      | TCGACGGATCCCCGGGAATTCCTATGACTCGTTGGTCT<br>CCG     |     |
| CINF-YC8-BD-F      | ATGGCCATGGAGGCCGAATTCATGCAAGCAGATGAGG<br>ATGTTG   | 801 |
| CINF-YC8-BD-R      | TCGACGGATCCCCGGGAATTCTTACTCCTCTTCATCAT<br>AATCTTC |     |
| CINF-YB1-pBridge-F | CCCGAATTCATGGCGGATTCTGATAACGAA                    | 618 |
| CINF-YB1-pBridge-R | CCCGAATTCCTACCGGTGTCCGGTGCC                       |     |
| CINF-YB2-pBridge-F | TTGACTGTATCGCCGGAATTCATGGCGGAGCCTCCCAC<br>CAGT    | 498 |
| CINF-YB2-pBridge-R | TCGACGGATCCCCGGGAATTCTTAGAGAAGAGAGATT<br>ATTACTTG |     |
| CINF-YB3-pBridge-F | CCCGAATTCATGGGAGATCAGCATAATGG                     | 405 |
| CINF-YB3-pBridge-R | CCCGAATTCTTAAAATTGATTATTGTGTTCTTG                 |     |
| CINF-YB4-pBridge-F | TTGACTGTATCGCCGGAATTCATGAGCGGCCACAAACG<br>AAAC    | 678 |
| CINF-YB4-pBridge-R | TCGACGGATCCCCGGGAATTCTCACCAACCAGAGCTCT<br>GTTG    |     |
| CINF-YB5-pBridge-F | CCCGAATTCATGGATGAAAACACAGGCATGTC                  | 480 |
| CINF-YB5-pBridge-R | CCCGAATTCTCATGCATCATGATTATTATTATTAG               |     |
| CINF-YB6-pBridge-F | TTGACTGTATCGCCGGAATTCATGTTGCTGACCCCAA<br>CAAGC    | 627 |
| CINF-YB6-pBridge-R | TCGACGGATCCCCGGGAATTCTCAAAGCTGGCTACCAT<br>TCCCC   |     |
| CINF-YB7-pBridge-F | CCCGAATTCATGGCTGACTCCGACAACGAT                    | 528 |

|                       |                                                 |     |
|-----------------------|-------------------------------------------------|-----|
| CINF-YB7-pBridge-R    | CCCGAATTCCTACCTGGGCCGACCCGTA                    |     |
| CINF-YB8-pBridge-F    | CCCGAATTCATGGCTGATGCTCCGGCGA                    | 528 |
| CINF-YB8-pBridge-R    | CCCGAATTCTTAATGCATATTATTATTCGAGAG               |     |
| CINF-YB9-pBridge-F    | TTGACTGTATCGCCGGAATTCATGGAGAAAAAAGTAG<br>GTGCC  | 486 |
| CINF-YB9-pBridge-R    | TCGACGGATCCCCGGGAATTCTCAGTTATCACTGGCGC<br>CAATT |     |
| CINF-YB10--pBridge-F  | CCCGAATTCATGACCAAAATTATCAAAGAGATG               | 411 |
| CINF-YB10--pBridge-R  | CCCGAATTCTTAGCTCTCTAACTTTGCTCAG                 |     |
| CINF-YC1-pBridge-F    | CCCGCGGCCGCAATGGATCAGCAAGGGCATGG                | 783 |
| CINF-YC1-pBridge-R    | CCCAGATCTCTATTGATCAGGAGGGGTTTG                  |     |
| CINF-YC2-pBridge-F    | CCCGCGGCCGCAATGGACACCAACAATCAAGCC               | 663 |
| CINF-YC2-pBridge-R    | CCCAGATCTCTACCTCTGACCATCAAGAT                   |     |
| CINF-YC3-pBridge-F    | CCCGCGGCCGCAATGAGGCAAGCGGGAGCAT                 | 354 |
| CINF-YC3-pBridge-R    | CCCAGATCTTCAGCAAGGAATGGACATAGT                  |     |
| CINF-YC4-pBridge-F    | CCCGCGGCCGCAATGGATCAATCAGAGCGTTCTC              | 801 |
| CINF-YC4-pBridge-R    | CCCAGATCTCTATGCATCACTTTGCTGCTGA                 |     |
| CINF-YC5-pBridge-F    | CCCGCGGCCGCAATGCAAGCTGATGAAGATGTAG              | 792 |
| CINF-YC5-pBridge-R    | CCCAGATCTCTAACCTTCTTCGTCGTAATCT                 |     |
| CINF-YC6-pBridge-F    | CCCGCGGCCGCAATGGCTTCATCCAAAAAGTCAA              | 603 |
| CINF-YC6-pBridge-R    | CCCAGATCTCTATAACAACCAATGAAAATAGA                |     |
| CINF-YC7-pBridge-F    | CCCGCGGCCGCAATGGAGGAAGAGGAAACCGG                | 423 |
| CINF-YC7-pBridge-R    | CCCAGATCTCTATGACTCGTTGGTCTCCG                   |     |
| CINF-YC8-pBridge-F    | CCCGCGGCCGCAATGCAAGCAGATGAGGATGTTG              | 801 |
| CINF-YC8-pBridge-R    | CCCAGATCTTTACTCCTCTTCATCATAATCTTC               |     |
| <b><i>RT-qPCR</i></b> |                                                 |     |
| CINF-YA1-RT-F         | GGTGGACGGTTTCTCAA                               | 110 |
| CINF-YA1-RT-R         | GCAAGATCGCTTCTATCAGA                            |     |
| CINF-YA2-RT-F         | GCAGTAGCCAATTCCATAA                             | 105 |
| CINF-YA2-RT-R         | CACTTCGCTGCTGTCCC                               |     |
| CINF-YA3-RT-F         | TGGAGGACGTTTTGCTA                               | 112 |
| CINF-YA3-RT-R         | GCTTCCGTTCTGCTGTTC                              |     |
| CINF-YA4-RT-F         | GATGATGATGATGTGGAAGG                            | 100 |
| CINF-YA4-RT-R         | CAGATAAATGTAGTTGGGAAG                           |     |
| CINF-YA5-RT-F         | ACTCAAAATATGCAGATAACAC                          | 144 |
| CINF-YA5-RT-R         | TGGAGCCCCATTCATT                                |     |
| CINF-YA6-RT-F         | GATAGTCCCCGCGTTTG                               | 130 |
| CINF-YA6-RT-R         | GGATGATTCTTTGTTTCTC                             |     |
| CINF-YA7-RT-F         | GACTGCAACTTGCTCCG                               | 115 |
| CINF-YA7-RT-R         | ATACTGCTCCATTCTCCC                              |     |
| CINF-YB1-RT-F         | CGGCAGTGGGACAAATA                               | 149 |
| CINF-YB1-RT-R         | CACCAGCACCATAAACG                               |     |
| CINF-YB2-RT-F         | CGACGTTGGGATTTGAG                               | 148 |



|                |                            |     |
|----------------|----------------------------|-----|
| CINF-YB2-RT-R  | TGCTGGGAATTTTGACC          |     |
| CINF-YB3-RT-F  | ATGGCTTAGATAACTATGCTG      | 109 |
| CINF-YB3-RT-R  | TGTAGTTGTTGAGTAATTTTGC     |     |
| CINF-YB4-RT-F  | TCAGGGGAACCAGAAGA          | 131 |
| CINF-YB4-RT-R  | GAAGATGAGCCGCCATA          |     |
| CINF-YB5-RT-F  | TGATGATATTTGCTGTGCT        | 119 |
| CINF-YB5-RT-R  | ATCCCTTATTTTGTTGAGC        |     |
| CINF-YB6-RT-F  | GCATTTCAAATAGGGCACG        | 105 |
| CINF-YB6-RT-R  | AAGCTGGCTACCATTCC          |     |
| CINF-YB7-RT-F  | GGCGGTGGGGAATTTGG          | 112 |
| CINF-YB7-RT-R  | ACCTGGGCCGACCCGTAGT        |     |
| CINF-YB8-RT-F  | CTGCTAAAGGTGGTGATGC        | 139 |
| CINF-YB8-RT-R  | AGTACTTGAGAACTCGCATAA      |     |
| CINF-YB9-RT-F  | GCAAGAATGCCGGAAG           | 117 |
| CINF-YB9-RT-R  | TCGGCTTCATCATTATCC         |     |
| CINF-YB10-RT-F | AAGGTGGGAAGTGGAGTA         | 115 |
| CINF-YB10-RT-R | GCTTCGGTGCAGTGTTA          |     |
| CINF-YC1-RT-F  | GGTAAGCCTGTGATGGAC         | 100 |
| CINF-YC1-RT-R  | GATCAGGAGGGGTTTGA          |     |
| CINF-YC2-RT-F  | GGAGACCGGCAATGGAT          | 103 |
| CINF-YC2-RT-R  | CCACTCGCGTAAGAACC          |     |
| CINF-YC3-RT-F  | GGCCACTGATGTTTTCG          | 101 |
| CINF-YC3-RT-R  | AGCAAGGAATGGACATAGTTT      |     |
| CINF-YC4-RT-F  | ATGGGGAAGCAATTAGAT         | 104 |
| CINF-YC4-RT-R  | TGCTGCTGAGGTTGAGTAT        |     |
| CINF-YC5-RT-F  | CGAATATCCTGGTTGGTC         | 102 |
| CINF-YC5-RT-R  | TCGTAATCTTCCTCGTCAT        |     |
| CINF-YC6-RT-F  | ATCGGATCAAGAAAATCAT        | 132 |
| CINF-YC6-RT-R  | GAGCACAGCACGCATAT          |     |
| CINF-YC7-RT-F  | ACTCGCACTGTCGTTGA          | 105 |
| CINF-YC7-RT-R  | CTATGACTCGTTGGTCTCC        |     |
| CINF-YC8-RT-F  | TACCACCACCACCAGCAG         | 101 |
| CINF-YC8-RT-R  | AGGCCAGGCAGGGAATT          |     |
| ClGAPDH-F      | ATGGGCAAAGTTAAGATCGGCATCA  | 91  |
| ClGAPDH-R      | CCAATTCGATATCATCACTCTGC    |     |
| AtPR1-RT-F     | TCGTCTTTGTAGCTCTTGTAGGTG   | 120 |
| AtPR1-RT-R     | TAGATTCTCGTAATCTCAGCTCT    |     |
| AtPR5-RT-F     | ATGGCA AATATCTCCAGTATTCACA | 125 |
| AtPR5-RT-R     | ATGTCGGGGCAAGCCGCGTTGAGG   |     |
| AtActin-F      | GGCGATGAAGCTCAATCCAAACG    | 110 |
| AtActin-R      | GGTCACGACCAGCAAGATCAAGACG  |     |

---
